# Supplementary material for: Assessing the psychometric properties of the French WHOQOL-HIV BREF within the ANRS CO3 Aquitaine Cohort’s QuAliV ancillary study
Source: Springer Nature journal article supplement (doi:10.1186/s12955-020-01451-8), 2020-07-10
Supplement: MOESM1 [file 18170080]

## WHOQOL-HIV BREF

Lisez bien les questions et choisissez le bouton qui correspond à la réponse la mieux adaptée à ce que vous ressentez au cours des **deux dernières semaines**.

|   |                                             | Très mauvaise | Mauvaise | Ni bonne, ni mauvaise | Bonne | Très bonne |
|---|---------------------------------------------|---------------|----------|-----------------------|-------|------------|
| 1 | Comment évaluez-vous votre qualité de vie ? | 1             | 2        | 3                     | 4     | 5          |

|   |                                      | Pas du tout satisfait | Plutôt pas satisfait | Ni satisfait ni satisfait | Plutôt satisfait | Très satisfait |
|---|--------------------------------------|-----------------------|----------------------|---------------------------|------------------|----------------|
| 2 | Êtes-vous satisfait de votre santé ? | 1                     | 2                    | 3                         | 4                | 5              |

Les questions suivantes portent sur la manière dont vous avez ressenti certaines situations au cours des **deux dernières semaines**.

|    |                                                                                                      | Pas du tout | Un peu | Modérément | Beaucoup | Extrêmement |
|----|------------------------------------------------------------------------------------------------------|-------------|--------|------------|----------|-------------|
| 3  | La douleur physique vous empêche-t-elle de faire ce dont vous avez envie ?                           | 1           | 2      | 3          | 4        | 5           |
| 4  | Dans quelle mesure, êtes-vous tracassé par tout problème physique lié à votre infection par le VIH ? | 1           | 2      | 3          | 4        | 5           |
| 5  | Un traitement médical vous est-il nécessaire pour faire face à la vie de tous les jours ?            | 1           | 2      | 3          | 4        | 5           |
| 6  | Trouvez-vous la vie agréable ?                                                                       | 1           | 2      | 3          | 4        | 5           |
| 7  | Estimez-vous que votre vie a du sens ?                                                               | 1           | 2      | 3          | 4        | 5           |
| 8  | Êtes-vous affecté par les reproches des personnes autour de vous par rapport au VIH ?                | 1           | 2      | 3          | 4        | 5           |
| 9  | Avez-vous peur de l'avenir ?                                                                         | 1           | 2      | 3          | 4        | 5           |
| 10 | Êtes-vous inquiet par rapport à la mort ?                                                            | 1           | 2      | 3          | 4        | 5           |
| 11 | Êtes-vous capable de vous concentrer ?                                                               | 1           | 2      | 3          | 4        | 5           |
| 12 | Vous sentez-vous en sécurité dans votre vie de tous les jours ?                                      | 1           | 2      | 3          | 4        | 5           |
| 13 | Vivez-vous dans un environnement sain (pollution, bruit, salubrité, ...) ?                           | 1           | 2      | 3          | 4        | 5           |

Les questions suivantes visent à évaluer dans quelle mesure vous avez vécu ou été capable de faire certaines choses de manière complète au cours des **deux dernières semaines**.

|    |                                                           | Pas du tout | Un peu | Modérément | Beaucoup | Extrêmement |
|----|-----------------------------------------------------------|-------------|--------|------------|----------|-------------|
| 14 | Avez-vous assez d'énergie dans la vie de tous les jours ? | 1           | 2      | 3          | 4        | 5           |
| 15 | Acceptez-vous votre apparence physique ?                  | 1           | 2      | 3          | 4        | 5           |
| 16 | Avez-vous assez d'argent pour satisfaire vos besoins ?    | 1           | 2      | 3          | 4        | 5           |
| 17 | Vous sentez-vous accepté par votre entourage ?            | 1           | 2      | 3          | 4        | 5           |

**WHOQOL-HIV BREF**

|    |                                                                                          |   |   |   |   |   |
|----|------------------------------------------------------------------------------------------|---|---|---|---|---|
| 18 | Avez-vous le sentiment d'être assez informé pour faire face à la vie de tous les jours ? | 1 | 2 | 3 | 4 | 5 |
| 19 | Avez-vous l'occasion de pratiquer des loisirs ?                                          | 1 | 2 | 3 | 4 | 5 |

|    |                                        |          |     |                 |      |           |
|----|----------------------------------------|----------|-----|-----------------|------|-----------|
|    |                                        | Très mal | Mal | Ni mal, ni bien | Bien | Très bien |
| 20 | Comment arrivez-vous à vous déplacer ? | 1        | 2   | 3               | 4    | 5         |

Les questions suivantes portent sur la manière dont vous avez été satisfait, heureux ou bien par rapport aux différents aspects de votre vie au cours des **deux dernières semaines**.

|    |                                                                                      | Pas du tout satisfait | Plutôt pas satisfait | Ni satisfait ni insatisfait | Plutôt satisfait | Très satisfait |
|----|--------------------------------------------------------------------------------------|-----------------------|----------------------|-----------------------------|------------------|----------------|
| 21 | Êtes-vous satisfait de votre sommeil ?                                               | 1                     | 2                    | 3                           | 4                | 5              |
| 22 | Êtes-vous satisfait de votre capacité à effectuer les tâches de la vie quotidienne ? | 1                     | 2                    | 3                           | 4                | 5              |
| 23 | Êtes-vous satisfait de votre capacité à travailler ?                                 | 1                     | 2                    | 3                           | 4                | 5              |
| 24 | Êtes-vous satisfait de vous ?                                                        | 1                     | 2                    | 3                           | 4                | 5              |
| 25 | Êtes-vous satisfait de vos relations avec les autres ?                               | 1                     | 2                    | 3                           | 4                | 5              |
| 26 | Êtes-vous satisfait de votre vie sexuelle ?                                          | 1                     | 2                    | 3                           | 4                | 5              |
| 27 | Êtes-vous satisfait du soutien de vos amis ?                                         | 1                     | 2                    | 3                           | 4                | 5              |
| 28 | Êtes-vous satisfait avec votre lieu de vie ?                                         | 1                     | 2                    | 3                           | 4                | 5              |
| 29 | Êtes-vous satisfait de l'accès aux services de santé ?                               | 1                     | 2                    | 3                           | 4                | 5              |
| 30 | Êtes-vous satisfait de vos moyens de transport ?                                     | 1                     | 2                    | 3                           | 4                | 5              |

La question suivante se rapporte à la fréquence avec laquelle vous avez ressenti ou vécu certaines choses pendant les **deux dernières semaines**.

|    |                                                                                                             | Jamais | Parfois | Assez Souvent | Très souvent | Tout le temps |
|----|-------------------------------------------------------------------------------------------------------------|--------|---------|---------------|--------------|---------------|
| 31 | Avez-vous des sentiments négatifs tels que de la mélancolie, du désespoir, de l'anxiété, de la dépression ? | 1      | 2       | 3             | 4            | 5             |
