# Supplementary material for: Assessing the psychometric properties of the French WHOQOL-HIV BREF within the ANRS CO3 Aquitaine Cohort’s QuAliV ancillary study
Source: Springer Nature journal article supplement (doi:10.1186/s12955-020-01451-8), 2020-07-10
Supplement: MOESM2 [file 18170080]

Table A.2 – Pearson’s correlations for the WHOQOL-HIV BREF questionnaire, from 511 people living with HIV in the Aquitaine cohort (Continued)

|      | I. Physical health |      |      |      | II. Psychological health |      |      |      | III. Level of independence |      |      |      | IV. Social relations |      |      |      | V. Environmental health |      |      |      |      | VI. Spirituality/religion and personal beliefs |      |      |      |      |      |      |      |  |
|------|--------------------|------|------|------|--------------------------|------|------|------|----------------------------|------|------|------|----------------------|------|------|------|-------------------------|------|------|------|------|------------------------------------------------|------|------|------|------|------|------|------|--|
|      | Q3*                | Q4*  | Q14  | Q14  | Q6                       | Q11  | Q15  | Q24  | Q31*                       | Q5*  | Q20  | Q22  | Q23                  | Q17  | Q25  | Q26  | Q27                     | Q12  | Q13  | Q16  | Q18  | Q19                                            | Q28  | Q29  | Q30  | Q7   | Q8*  | Q9*  | Q10* |  |
| Q12  | 0.30               | 0.32 | 0.44 | 0.27 | 0.55                     | 0.55 | 0.31 | 0.41 | 0.44                       | 0.25 | 0.36 | 0.41 | 0.43                 | 0.38 | 0.37 | 0.30 | 0.40                    | 1    |      |      |      |                                                |      |      |      |      |      |      |      |  |
| Q13  | 0.10               | 0.11 | 0.23 | 0.12 | 0.23                     | 0.26 | 0.18 | 0.15 | 0.14                       | 0.06 | 0.15 | 0.14 | 0.17                 | 0.21 | 0.14 | 0.14 | 0.15                    | 0.34 | 1    |      |      |                                                |      |      |      |      |      |      |      |  |
| Q16  | 0.30               | 0.22 | 0.32 | 0.15 | 0.46                     | 0.33 | 0.27 | 0.20 | 0.23                       | 0.15 | 0.40 | 0.34 | 0.37                 | 0.39 | 0.17 | 0.27 | 0.25                    | 0.43 | 0.32 | 1    |      |                                                |      |      |      |      |      |      |      |  |
| Q18  | 0.24               | 0.23 | 0.30 | 0.16 | 0.37                     | 0.36 | 0.24 | 0.26 | 0.26                       | 0.13 | 0.27 | 0.33 | 0.29                 | 0.44 | 0.27 | 0.25 | 0.35                    | 0.42 | 0.25 | 0.39 | 1    |                                                |      |      |      |      |      |      |      |  |
| Q19  | 0.31               | 0.19 | 0.38 | 0.17 | 0.50                     | 0.34 | 0.26 | 0.25 | 0.25                       | 0.20 | 0.44 | 0.34 | 0.38                 | 0.32 | 0.23 | 0.27 | 0.24                    | 0.42 | 0.32 | 0.55 | 0.38 | 1                                              |      |      |      |      |      |      |      |  |
| Q28  | 0.18               | 0.19 | 0.27 | 0.16 | 0.35                     | 0.36 | 0.18 | 0.27 | 0.24                       | 0.16 | 0.26 | 0.28 | 0.24                 | 0.32 | 0.33 | 0.24 | 0.35                    | 0.40 | 0.37 | 0.37 | 0.39 | 0.32                                           | 1    |      |      |      |      |      |      |  |
| Q29  | 0.17               | 0.17 | 0.17 | 0.14 | 0.20                     | 0.15 | 0.15 | 0.19 | 0.10                       | 0.06 | 0.19 | 0.25 | 0.22                 | 0.19 | 0.20 | 0.15 | 0.21                    | 0.22 | 0.10 | 0.13 | 0.29 | 0.17                                           | 0.28 | 1    |      |      |      |      |      |  |
| Q30  | 0.20               | 0.17 | 0.20 | 0.14 | 0.25                     | 0.20 | 0.16 | 0.21 | 0.16                       | 0.14 | 0.34 | 0.34 | 0.30                 | 0.23 | 0.21 | 0.18 | 0.25                    | 0.33 | 0.22 | 0.31 | 0.32 | 0.26                                           | 0.30 | 0.42 | 1    |      |      |      |      |  |
| Q7   | 0.24               | 0.25 | 0.42 | 0.24 | 0.65                     | 0.45 | 0.38 | 0.47 | 0.47                       | 0.22 | 0.27 | 0.36 | 0.40                 | 0.36 | 0.42 | 0.34 | 0.38                    | 0.50 | 0.21 | 0.32 | 0.39 | 0.40                                           | 0.32 | 0.14 | 0.16 | 1    |      |      |      |  |
| Q8*  | 0.19               | 0.24 | 0.19 | 0.17 | 0.22                     | 0.20 | 0.14 | 0.17 | 0.26                       | 0.17 | 0.13 | 0.16 | 0.14                 | 0.28 | 0.19 | 0.20 | 0.17                    | 0.21 | 0.12 | 0.24 | 0.21 | 0.17                                           | 0.20 | 0.06 | 0.10 | 0.16 | 1    |      |      |  |
| Q9*  | 0.30               | 0.37 | 0.32 | 0.25 | 0.34                     | 0.29 | 0.24 | 0.34 | 0.50                       | 0.20 | 0.20 | 0.33 | 0.32                 | 0.31 | 0.29 | 0.27 | 0.27                    | 0.39 | 0.10 | 0.20 | 0.30 | 0.19                                           | 0.24 | 0.15 | 0.16 | 0.33 | 0.36 | 1    |      |  |
| Q10* | 0.12               | 0.22 | 0.17 | 0.18 | 0.19                     | 0.21 | 0.18 | 0.20 | 0.35                       | 0.11 | 0.05 | 0.16 | 0.11                 | 0.21 | 0.21 | 0.18 | 0.21                    | 0.26 | 0.10 | 0.11 | 0.14 | 0.12                                           | 0.17 | 0.05 | 0.09 | 0.19 | 0.25 | 0.60 | 1    |  |
